# Supplementary material
Source: PubMed Central journal article supplement (PMC4958574)
Supplement: NIHMS761798-supplement.pdf [file NIHMS761798-supplement.pdf]

Supplemental Table 1  
Mode of Death Categories and Associated Seminal Complications

---

**Systemic Circulatory Failure**

Low cardiac output syndrome  
Failure to separate from cardiopulmonary bypass  
Unplanned surgical/transcatheter re-intervention on systemic circulation  
Chronic heart failure

**Inadequate Pulmonary Blood Flow**

Pulmonary hypertension  
Hypoxemia relative to expected physiology

**Cardiac Arrest**

**Postoperative Bleeding**

Bleeding requiring reoperation  
Bleeding requiring transfusion

**Respiratory Failure**

Acute respiratory failure  
Chronic respiratory failure  
Diaphragm paralysis

**Arrhythmia**

**Other**

Chylothorax  
Non-cardiac surgery  
Thrombosis  
Hospital-acquired infection  
Stroke  
Necrotizing enterocolitis  
Acute kidney injury  
Hydrocephalus  
Pneumothorax  
Lung graft failure

---
